# Supplementary material for: Unique Salt-Tolerance-Related QTLs, Evolved in Vigna riukiuensis (Na+ Includer) and V. nakashimae (Na+ Excluder), Shed Light on the Development of Super-Salt-Tolerant Azuki Bean (V. angularis) Cultivars
Source: MDPI journal article supplement (doi:10.3390/plants12081680), 2023-04-17
Supplement: s1 [file s1]

**Table S1.** RAD markers from *V. nakashimae* 'Ukushima', *V. riukiensis* 'Tojinbaka' and F<sub>2</sub> population.

|                                        | Number of reads         | Mapping ratio to genome (%) | Number of RAD markers |         |           | Mean coverage depth <sup>2</sup> |         |           |
|----------------------------------------|-------------------------|-----------------------------|-----------------------|---------|-----------|----------------------------------|---------|-----------|
|                                        |                         |                             | Total                 | Chr1-11 | Scaffolds | Total                            | Chr1-11 | Scaffolds |
| All samples                            | 536,785,685             |                             | 25,350 <sup>3</sup>   |         |           |                                  |         |           |
| <i>V. nakashimae</i> 'Ukushima'        | 13,052,980 <sup>4</sup> | 74.1                        | 15,438 <sup>4</sup>   | 14,856  | 582       | 36.8                             | 36.1    | 54.2      |
| <i>V. riukiensis</i> 'Tojinbaka'       | 6,632,164               | 62.0                        | 5,469 <sup>5</sup>    | 5,348   | 121       | 32.4                             | 32.0    | 41.3      |
| F <sub>2</sub> population (310 plants) | 515,437,838             |                             |                       |         |           |                                  |         |           |
| Average per plant                      | 1,662,703               | 55.4                        | 2,485 <sup>6</sup>    | 2,485   | 19        | 17.4                             | 17.4    | 15.3      |

<sup>1</sup> The custom genome constructed using 'Ukushima' RAD-tag reads.

<sup>2</sup> Mean read depth per SNP sites.

<sup>3</sup> Total detected SNPs (filtered by depth and quality)

<sup>4</sup> SNPs of homozygous A (same to reference) in 'Ukushima'.

<sup>5</sup> SNPs of homozygous B in 'Tojinbaka'.

<sup>6</sup> SNPs of homozygous A and B in 'Ukushima' and 'Tojinbaka', A or B or H in F<sub>2</sub> plants.

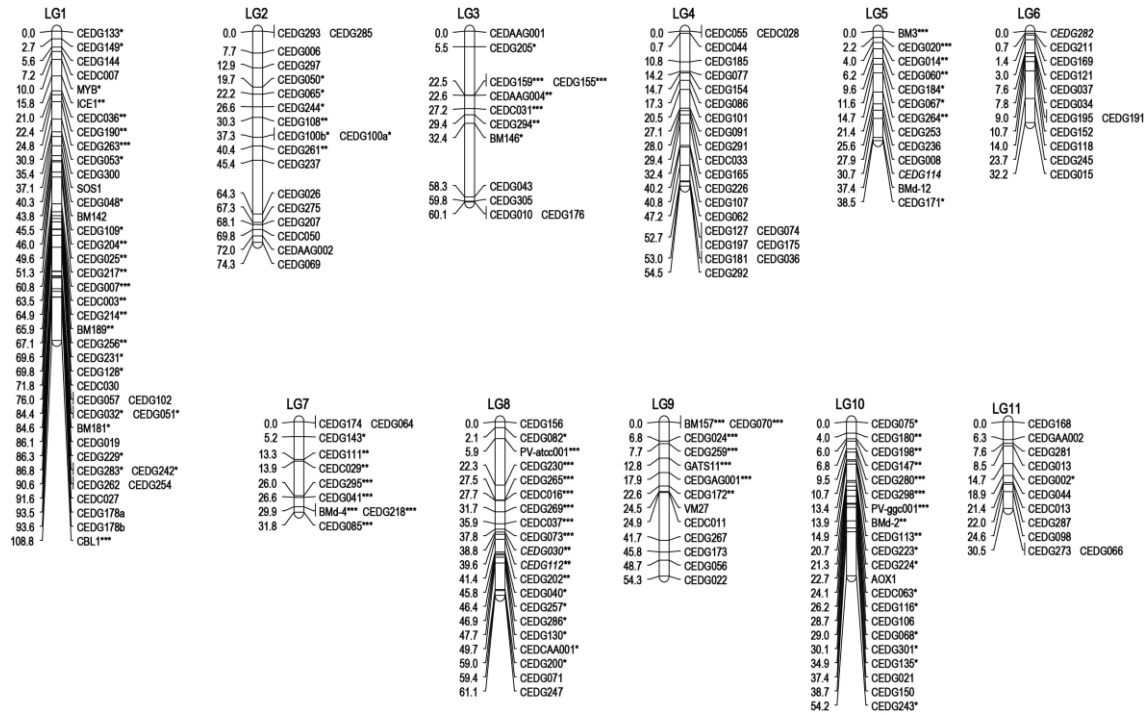

**Figure S1.** linkage map of population A

A genetic map of interspecific cross constructed from an  $F_2$  population (*V. angularis* 'Kyoto Dainagon' x *V. riukiensis* 'Tojinbaka'). Map distances and marker names are shown on the left and right side of the linkage groups, respectively. Marker names in italic indicate dominant loci. Markers showing significant deviation from the expected segregation ratio at the 0.05, 0.01 and 0.001 levels are indicated with \*, \*\* and \*\*\*, respectively.

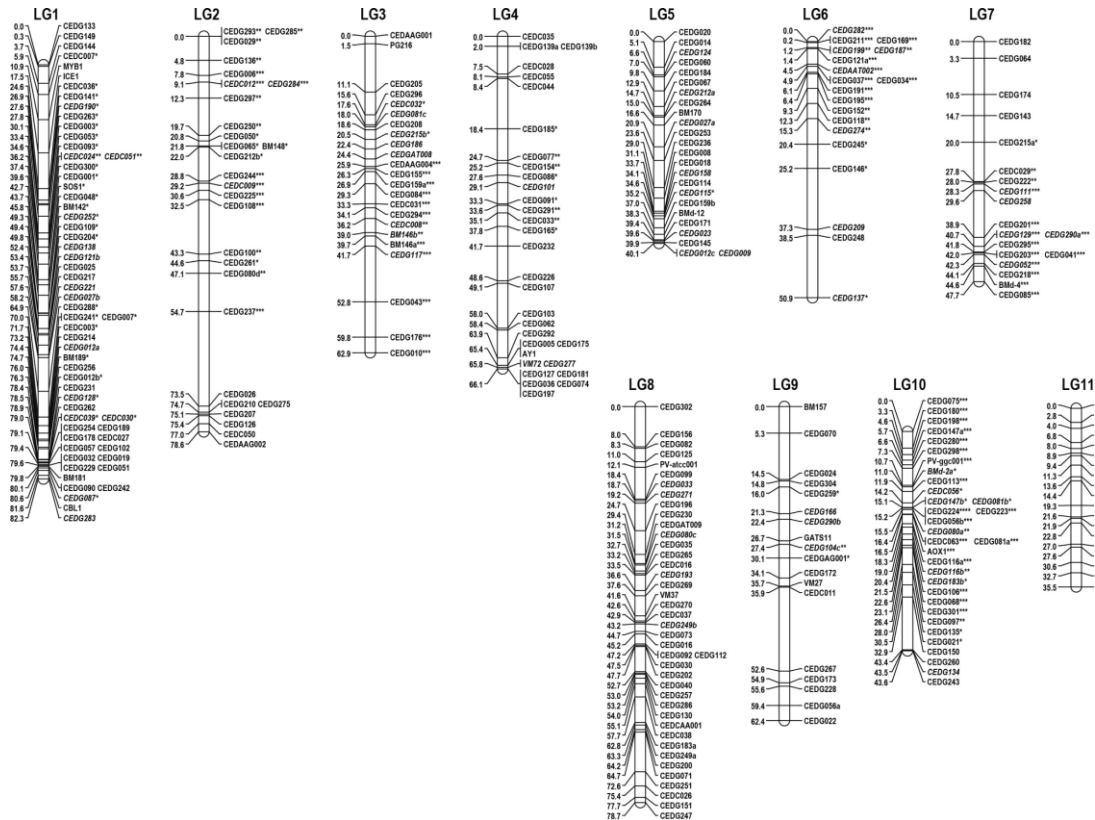

**Figure S2.** linkage map of population B

A genetic map of interspecific cross constructed from an  $F_2$  population (*V. angularis* 'Kyoto Dainagon' x *V. nakashimae* 'Ukushima'). Map distances and marker names are shown on the left and right side of the linkage groups, respectively. Marker names in italic indicate dominant loci. Markers showing significant deviation from the expected segregation ratio at the 0.05, 0.01 and 0.001 levels are indicated with \*, \*\* and \*\*\*, respectively.



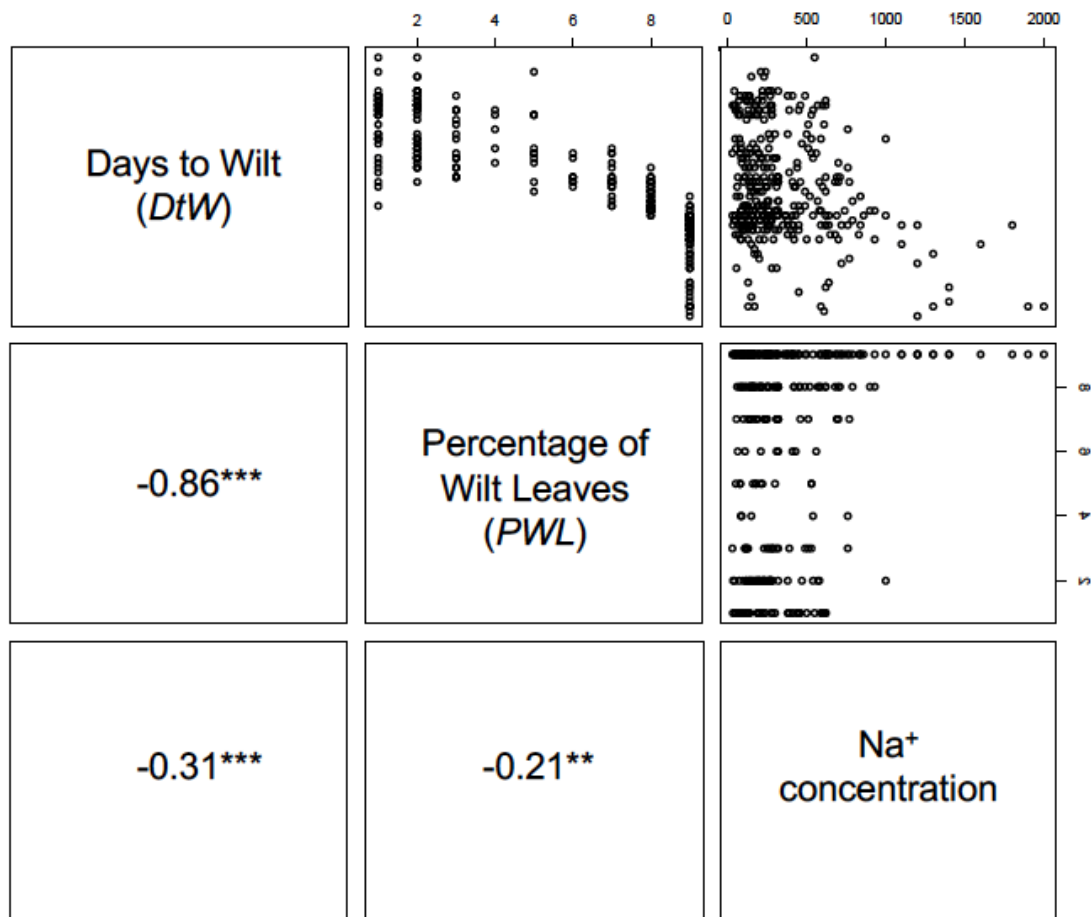

**Figure S4.** Correlations among traits in population C.

(Upper right) The correlation among Days to Wilt (*DtW*), Percentage of Wilt Leaves (*PWL*) and  $\text{Na}^+$  concentration in primary leaf of  $F_2$  population derived from a cross between *V. nakashimae* 'Ukushima' x *V. riukiensis* 'Tojinbaka'. (Bottom left) Pearson's product-moment correlation coefficient. (\*\*\*)  $P < 0.0001$ , (\*\*)  $P < 0.001$ , (\*)  $P < 0.01$ )

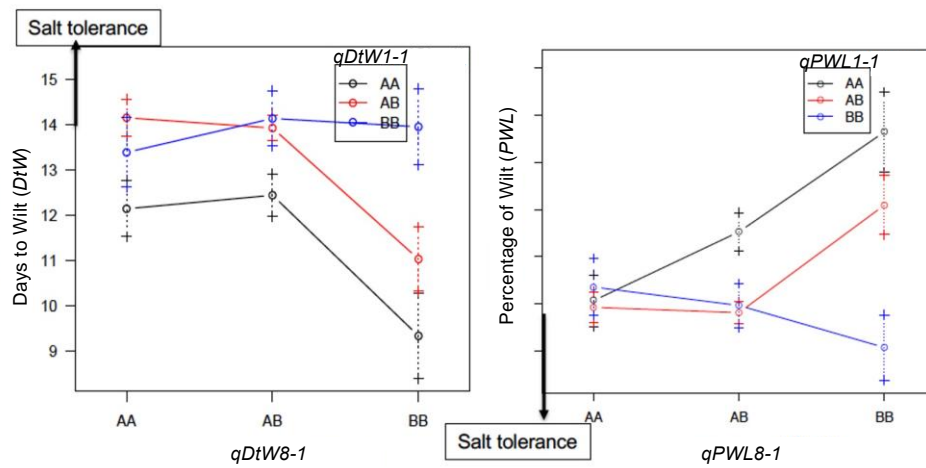

**Figure S5.** Genetic interaction

Genetic interaction was observed in (left) Day to Wilt (*DtW*) and (right) Percentage of Wilt Leaves (*PWL*) between *qDtW1-1/qPWL1-1* (CEDG242, BM181) and *qDtW8-1/qPWL8-1* (PV-atcc001) in population A (*V. angularis* 'Kyoto Dainagon' [genotype: A] x *V. riukiensis* 'Tojinbaka' [genotype: B]).
